# Supplementary material
Source: MDPI journal article supplement (https://www.mdpi.com/2073-4395/9/7/346)
Supplement: s1 [file s1]

Table S1. Effects of mild ( $\Psi_{pd} > -0.4$  MPa) and moderate ( $-0.4$  MPa  $< \Psi_{pd} < -0.6$ MPa) water deficits on the Water Index (WI), the normalized Water Index (WI<sub>norm</sub>), the Photochemical Reflectance Index (PRI) and the normalized Photochemical Reflectance index (PRI<sub>norm</sub>). Values are mean  $\pm$  one standard error of the mean (n = 6 for mild water deficits in 2009 and 2010; n = 8 and n = 7 for moderate water deficits in 2009 and 2010, respectively). Significant differences between mild and moderate water deficits at P < 0.05 (\*) and P < 0.01 (\*\*) within a year are indicated.

|                     | 2009              |                      | 2010               |                     |
|---------------------|-------------------|----------------------|--------------------|---------------------|
|                     | mild              | moderate             | mild               | moderate            |
| WI                  | 1.04 $\pm$ 0.026  | 1.11 $\pm$ 0.007**   | 1.10 $\pm$ 0.012   | 1.17 $\pm$ 0.003*   |
| WI <sub>norm</sub>  | 1.17 $\pm$ 0.064  | 1.30 $\pm$ 0.048**   | 1.22 $\pm$ 0.055   | 1.31 $\pm$ 0.093*   |
| PRI                 | 0.031 $\pm$ 0.008 | -0.012 $\pm$ 0.005** | -0.054 $\pm$ 0.007 | -0.082 $\pm$ 0.002* |
| PRI <sub>norm</sub> | 0.014 $\pm$ 0.003 | -0.05 $\pm$ 0.002*   | -0.019 $\pm$ 0.007 | -0.032 $\pm$ 0.003* |
